# Supplementary material for: Modelling Complex Bimolecular Reactions in a Condensed Phase: The Case of Phosphodiester Hydrolysis
Source: MDPI journal article supplement (doi:10.3390/molecules28052152), 2023-02-24
Supplement: s1 [file s1]

# Supplementary Materials: Modelling Complex Bimolecular Reactions in a Condensed Phase: The Case of Phosphodiester Hydrolysis

## 1. Transition States Geometries

Coordinates of the transition states.

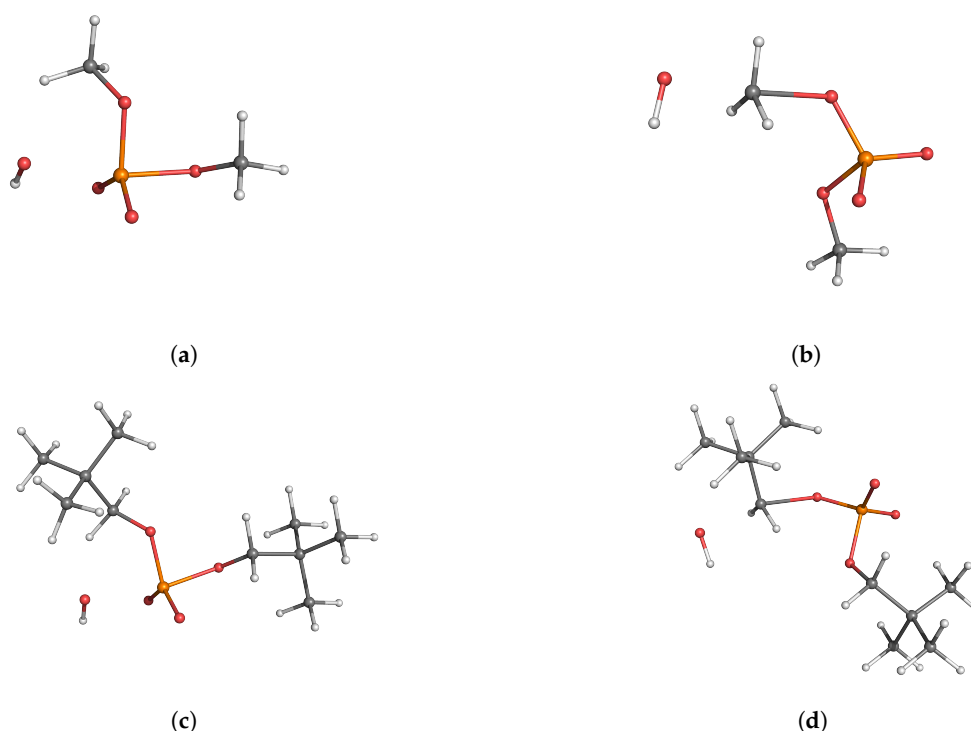

**Figure S1.** (a) TS structure of the  $DMP^-$  hydrolysis via the nucleophilic attack on the P atom; (b) TS structure of the  $DMP^-$  hydrolysis via the nucleophilic attack on the C atom; (c) TS structure of the  $Np_2P^-$  hydrolysis via the nucleophilic attack on the P atom; (d) TS structure of the  $Np_2P^-$  hydrolysis via the nucleophilic attack on the C atom.

(a) TS Cartesian coordinates for the  $DMP^-$  hydrolysis via the nucleophilic attack on the P atom.

15

|   |                   |                   |                   |
|---|-------------------|-------------------|-------------------|
| P | 0.04759421574112  | -0.37289143256568 | 0.16214622555207  |
| O | 0.60528130395693  | -0.41764604983953 | 1.56027166244113  |
| O | -0.27373422990218 | -1.47125742708887 | -0.80475060734840 |
| O | 0.06133019988439  | 1.12633676562971  | -0.59017066777321 |
| C | 0.93358752866231  | 2.08300625220335  | -0.06780741680389 |
| H | 0.87300750397068  | 2.97402291362842  | -0.71299321908439 |
| H | 1.95136244274459  | 1.67523889503383  | -0.06785770573723 |
| H | 0.65175041929921  | 2.37744951461538  | 0.95586318838359  |
| O | -1.63993055450580 | -0.03562598869778 | 0.72571594525318  |
| C | -2.61287534100408 | 0.00927191918207  | -0.24597943999263 |

|   |                   |                   |                   |
|---|-------------------|-------------------|-------------------|
| H | -2.56052191670488 | -0.85874664665831 | -0.92335020249146 |
| H | -2.54805223956379 | 0.91725290955621  | -0.88020134053056 |
| H | -3.61280160757574 | 0.01981769126223  | 0.23067545442331  |
| O | 2.19038204976939  | -0.39406106436631 | -0.50360843852532 |
| H | 2.45204022522786  | -0.67867825189471 | 0.37310656223382  |

(b) TS Cartesian coordinates for the  $DMP^-$  hydrolysis via the nucleophilic attack on the C atom.

15

|   |                 |                 |                 |
|---|-----------------|-----------------|-----------------|
| P | -0.752026352730 | -0.520874390119 | 0.086523104568  |
| O | -0.467761894950 | -0.202085469628 | 1.537376447430  |
| O | -1.974728614517 | -1.348114862770 | -0.226751311029 |
| O | 0.503822119798  | -0.961453905786 | -0.717558509519 |
| C | 2.170714968227  | -0.161405969195 | -0.264537672328 |
| H | 1.913378811594  | -0.154945178390 | 0.779168039383  |
| H | 2.665517415346  | -1.010225355153 | -0.694215970735 |
| H | 1.951109092432  | 0.691500008540  | -0.876048680786 |
| O | -1.035403394174 | 1.001777916644  | -0.645632422750 |
| C | -2.084222373652 | 1.713471508742  | -0.078455082457 |
| H | -2.169565594618 | 2.684307158857  | -0.590497526226 |
| H | -1.917650472442 | 1.894104827457  | 0.993918429378  |
| H | -3.042461554358 | 1.180066884092  | -0.182820404446 |
| O | 3.988299695110  | 0.565952029941  | 0.089432159668  |
| H | 3.776158148935  | 1.217404796767  | 0.760499399851  |

(c) TS Cartesian coordinates for the  $Np_2P^-$  hydrolysis via the nucleophilic attack on the P atom.

39

|   |                 |                 |                 |
|---|-----------------|-----------------|-----------------|
| P | 0.994501106803  | -1.508294160479 | 0.424918839545  |
| O | 1.493160066407  | -1.746751284499 | 1.836231538591  |
| O | 0.748093738542  | -2.473050333501 | -0.711057564652 |
| O | 1.031949971167  | 0.093838812166  | -0.113374336729 |
| C | 1.959347637495  | 0.979764525536  | 0.441057772672  |
| H | 2.799990397689  | 0.402847977757  | 0.847792022831  |
| H | 1.480084042791  | 1.581245552463  | 1.242340797763  |
| C | 2.491729406061  | 1.934723661459  | -0.642129847853 |
| C | 3.062742291117  | 1.104420656270  | -1.795441549830 |
| H | 3.669720330241  | 0.278452273872  | -1.396022981003 |
| H | 3.637535744871  | 1.743099612381  | -2.487571898288 |
| H | 2.247171476480  | 0.623133956455  | -2.344518739232 |
| C | 3.596556039724  | 2.786635676870  | -0.013123105647 |
| H | 4.432491562191  | 2.150827806806  | 0.302368601275  |
| H | 3.227168247369  | 3.326572440652  | 0.871091636057  |
| H | 3.980115692939  | 3.531036647311  | -0.727349868236 |
| C | 1.366816717597  | 2.841553583518  | -1.149584346813 |
| H | 1.711997753369  | 3.483169143866  | -1.975843121955 |
| H | 0.987154461961  | 3.491557389278  | -0.347546181953 |
| H | 0.535264805115  | 2.225247762712  | -1.507812862710 |
| O | -0.727961405161 | -1.255276782671 | 0.924833838454  |
| C | -1.676469532653 | -1.122243639887 | -0.065455265363 |
| H | -1.486203896162 | -1.833242536148 | -0.890771097684 |
| H | -1.672474503717 | -0.100754128827 | -0.510098549594 |
| C | -3.087964737080 | -1.381233017910 | 0.508785688030  |

|   |                 |                 |                 |
|---|-----------------|-----------------|-----------------|
| C | −3.354902548824 | −0.395767397317 | 1.647599986622  |
| H | −3.344921641372 | 0.637399322172  | 1.274742855749  |
| H | −2.558196573278 | −0.486976939534 | 2.392957990990  |
| H | −4.330787466931 | −0.581095704169 | 2.125026124573  |
| C | −3.141779467029 | −2.811434744116 | 1.048639323956  |
| H | −4.101945549658 | −3.020645232825 | 1.546405500878  |
| H | −2.317587223133 | −2.954114728304 | 1.755005177478  |
| H | −3.005138855744 | −3.535342272264 | 0.235162753403  |
| C | −4.130141237624 | −1.196123228441 | −0.594447926995 |
| H | −3.942251494653 | −1.885827018313 | −1.427866634629 |
| H | −4.099460185092 | −0.173499915090 | −0.994834352507 |
| H | −5.148387891103 | −1.383068371680 | −0.220201483946 |
| O | 3.223294193502  | −1.413632394251 | −0.135590551798 |
| H | 3.449688525783  | −1.957152971320 | 0.625681818549  |

(d) TS Cartesian coordinates for the  $Np_2P^-$  hydrolysis via the nucleophilic attack on the C atom.

39

|   |                   |                   |                   |
|---|-------------------|-------------------|-------------------|
| P | −0.55772502469627 | 2.34775585747232  | 0.21680371112853  |
| O | 0.52940279284981  | 3.38760458790239  | 0.45287211568934  |
| O | −0.71100562738424 | 1.22424482527671  | 1.24024869411437  |
| O | −0.11840508602288 | 1.52734385600618  | −1.24566638318436 |
| C | 0.59749244070556  | 0.33500203782766  | −1.18394964662555 |
| H | 0.18682447107427  | −0.34956173491203 | −1.95227174873235 |
| H | 0.46237051228194  | −0.14005609367996 | −0.19832476784258 |
| C | 2.10854736046578  | 0.50361718868105  | −1.47588244236677 |
| C | 2.27825528037575  | 1.31709421452552  | −2.76026946708000 |
| H | 1.81160471960984  | 0.80604938221420  | −3.61428549713206 |
| H | 3.34237763059918  | 1.47359640571533  | −2.99172217015054 |
| H | 1.78664570052166  | 2.28681977535965  | −2.63956037867105 |
| C | 2.72286221466578  | −0.88802761907775 | −1.65368633034191 |
| H | 2.27162024785720  | −1.41849548210049 | −2.50412657881086 |
| H | 2.56735959114287  | −1.50006681575008 | −0.75521449071786 |
| H | 3.80584506998383  | −0.81948966530378 | −1.83208650386095 |
| C | 2.79130194440910  | 1.23084913680704  | −0.31444269102237 |
| H | 2.27091685803482  | 2.17347580973399  | −0.08930956422940 |
| H | 3.84872234404193  | 1.43142825834984  | −0.54999148759089 |
| H | 2.75160661303130  | 0.62021347168598  | 0.59687022532529  |
| O | −1.91227782208680 | 2.99403612200267  | −0.23670534339572 |
| C | −3.31462570707554 | 1.92865536542580  | −1.09493554929175 |
| H | −2.54214929562294 | 1.22921288751728  | −1.36789602170985 |
| H | −3.45359999070427 | 2.82141892924291  | −1.67901652592318 |
| C | −4.29889164556983 | 1.59643498592913  | 0.03328078036807  |
| C | −3.88705645943471 | 2.18339076529410  | 1.39194684574128  |
| H | −2.91568554984945 | 1.79263342509776  | 1.71017471148298  |
| H | −4.66125609529685 | 1.91445067427952  | 2.13086931785157  |
| H | −3.79864701533417 | 3.27282228829614  | 1.34145944312284  |
| C | −4.37852469826385 | 0.06983121333159  | 0.17719741649429  |
| H | −3.40347063520149 | −0.32050109909631 | 0.49273377803653  |
| H | −4.65619106571069 | −0.36619434562403 | −0.78770659432806 |
| H | −5.12071416344747 | −0.20137594595662 | 0.94390797976609  |
| C | −5.68199797173199 | 2.15671379301863  | −0.33509184274777 |
| H | −5.64036405130832 | 3.25347360339039  | −0.39268103146735 |
| H | −6.41507222906608 | 1.88854016496810  | 0.44120610100794  |

|   |                   |                  |                   |
|---|-------------------|------------------|-------------------|
| H | −5.99831637014825 | 1.76645941858960 | −1.30653164917275 |
| O | −4.44417171239319 | 1.04218388992068 | −2.57316496329435 |
| H | −3.73009357529522 | 0.90941746763293 | −3.20658645043508 |

The reported TS geometries for the  $DMP^-$  and  $Np_2P^-$  hydrolysis were obtained, as described in the Method section of the main text, at PBE0 [1]/6-311++G(2d,2p) and 6-31+G(d,p), respectively.

## 2. Gas-Phase PES of the Nucleophilic Attack at the P Atom in the $Np_2P^-$ Hydrolysis

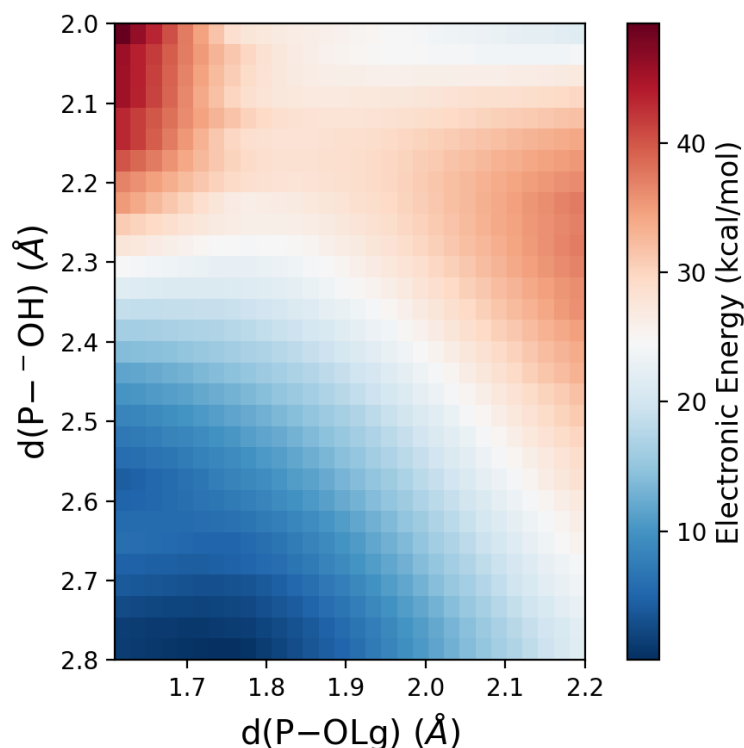

**Figure S2.** Bi-dimensional scan performed along the hydroxide oxygen atom–phosphorous atom and the phosphorous atom–leaving group oxygen distances.

### Reference

1. Adamo, C.; Barone, V. Toward reliable density functional methods without adjustable parameters: The PBE0 model. *J. Chem. Phys.* **1999**, *110*, 6158–6170.
